# Supplementary material for: RT-isoPCR: nested, high multiplex mRNA amplification
Source: Royal Society of Chemistry journal article supplement (doi:10.1039/c3an00803g), 2013-01-01
Supplement: c3an00803g.pdf [file c3an00803g.pdf]

## Supplementary Information

### Materials and methods

Primers were designed to amplify 24 human mRNA targets using the LAMP Designer program v 1.02 (Premier Biosoft). Primers and the targets NCBI accession numbers/versions are shown in Supplementary Table 1.

RNA was purified from whole blood using the QIAamp RNA Blood Mini Kit according to the manufacturer's instructions. In brief, 1.5 mL of whole blood was processed resulting in 100  $\mu$ L RNA eluate. Concentration and purity of the RNA eluate was determined using the Nanodrop 2000 (Thermo Scientific). The RNA eluate was allocated and stored at -80 °C until further processing.

The two-stage RT-isoPCR assay was performed as follows. A first-stage one-step reverse transcription PCR was performed using the AffinityScript One-Step RT-PCR kit (Agilent Technologies) according to the manufacturer's instruction. In brief, RT-isoPCR reactions were performed as singleplex reactions amplifying a single target or as multiplex reactions amplifying all 24 targets. First-stage reaction volumes (50  $\mu$ L) contained: FIP/BIP primer set(s) in concentrations of 0.4  $\mu$ M, 50% Hercules II RT-PCR 2x Master Mix, 1% AffinityScript RT/Rnase block and 1.5  $\mu$ L RNA eluate. Using a thermocycler (2720 Thermal Cycler from Applied Biosystems), the RT-PCR reagent mixture was subjected to an initial incubation at 45°C for 5 min to facilitate reverse transcription, this was followed by a 1 min hotstart at 95°C and 8 thermocycles of 20 s at 95°C, 20 s at 60°C and 20s at 72°C. Final elongation was performed for 5 min at 72°C. First-stage RT-PCR products were stored at -20°C if not processed directly in second-stage reactions.

Subsamples of the first-stage product were used as template in 24 individual isothermal amplification/detection reactions each with a single target. Second-stage reaction mixture (10  $\mu$ L) consisted of: 6  $\mu$ L of Isothermal Mastermix (Optigene), 1  $\mu$ L first-stage RT-PCR amplified product and primers in concentrations of 1.6  $\mu$ M FIP, 1.6  $\mu$ M BIP, 0.8  $\mu$ M LF and 0.8  $\mu$ M LB. Reactions were performed at 63°C for at least 45 min using the Genie II device (Optigene). The device measured the development in fluorescent signal in real-time. The time of detection (ToD) was determined as the time point at which the maximum slope in fluorescent increase was recorded.

A melting temperature analysis was performed by the Genie II device, following each individual isothermal reaction.

No template controls (NTC) were performed by substituting RNA eluate in the first-stage reaction and first-stage product in the second-stage reaction with water.

Supplementary Table 1: Primer design shown for 24 targets. The NCBI accession/version number is shown for the mRNA target sequence. All primer sequences are shown as 5' to 3'.

| #  | Target    | NCBI accession/version | FIP                                              | BIP                                             | LF                     | LB                     |
|----|-----------|------------------------|--------------------------------------------------|-------------------------------------------------|------------------------|------------------------|
| 1  | RPL28     | NM_001136134.1         | CCTACGCTCACTCACCATGCGCA<br>GGTGTCTCAGTGTTC       | GCCCAAAGTTGTGCGAGCTGA<br>ACAGAGGATGCCTCA        | ACTGGACTAAGAGCTGGAGA   | CCACAGCAGCAGAGACTC     |
| 2  | TMC8      | NM_152468.4            | GTGACCAGGAAGGCGAAGGGC<br>TGTACAAGCTGAGTATCTT     | GGTTCTCAGGCCGGTTCTGCAC<br>GATGTCCAGCACATT       | CACGGTGAGGAGGAAGTTG    | CTGGAACGGGAGGAGTTTC    |
| 3  | CD3D      | NM_000732.4            | TCCTCCAAGGTGGCTGTACTCTC<br>TGTTGAGGAATGACCCAG    | AACTGGGCTCGGAACAAGTGAC<br>AGTTGGTAATGGCTGC      | GCATCATCTCGATCTCGGAG   | CCTGAGACTGGTGGCTTC     |
| 4  | CD79B     | NM_000626.2            | CCAGCAGCAGGAAGATAGGCC<br>ACGCTGAAGGATGGTATC      | GGCTGGCATGGAGGAAGATCA<br>GGCTCACTATGTCTCATA     | AGCAGCGTCTGGATCATG     | TGGACATTGACCAGACAGC    |
| 5  | SPIB      | NM_003121.4            | TACAGGTGTGAGCCATTGCCCA<br>CTGTAGCACTTGGTGG       | AGCACTTTGGGAGGCGGACCA<br>GGCTGGCTTGAATG         | TGATGGCTGTGTTAATGT     | GGGAATGGCTGAACCCA      |
| 6  | HNRNPF    | NM_001098208.1         | GCTCTGCACTGTGAACCTACTA<br>GAGACCTCAGCTACTGTC     | GCCACTGTGTCCACATGAGGTG<br>AGAGGAGAGAAAGTTGTA    | GCCGTATCTGTGGTCATACAT  | GCGACCGAGAACGACATT     |
| 7  | TFCP2     | NM_005653.4            | AGCAAAGTACTTAGCCACTGTG<br>ACACTATCTGAAGTAGGTGCTA | AGCTGGCAGGCAGTGATGAGC<br>ACTGGTGGTATGAGA        | TTTCTCATCTTCGGTTGGG    | CTGAAATCCAACAGGCAATC   |
| 8  | AF289562  | AF289562               | AACTGCTGCTGTGCTCCCTGT<br>GGATGGTTGTCAAGTC        | CTCCAGGATCGGCCATGTTCAA<br>TGCAGCTTGAGGTTTCA     | TCTCATCATCTGACTCACTCT  | ACCGCTCTACTGTCTC       |
| 9  | KLRC4     | NM_001199805.1         | CTTCCCACTGCCAAGATCCATTC<br>TGGTGAAGTCATATCATTGGA | GGCTCCATTCTCACCCCAACAA<br>GCTCGAGGCATAGAGT      | GTTGGAATGTGTACTAGTCCCA | ATTGAAATGCAGAAGGGAGACT |
| 10 | SLAMF7    | NM_021181.3            | GGAGTGCAGTGGTCCATGGC<br>ATGAGAATCGCTTGA          | ACACCTGTGCTAGGTCACTTA<br>GATGGTGAAGTCTGTGT      | CTCAGCTCACTGCAACCT     | CGTAAGATGAACATCCCTACCA |
| 11 | TNFRSF10c | NM_003841.3            | CACTTCCGGCACATCTCTGGACC<br>ATGACCAGAGACACA       | TAGCAGGTGCCTAGTGGGCCA<br>AATTCTTCAACACACTGG     | TGCCTTCTTACTACTGACACA  | AGTCAGTAATTGTACGCTCTGG |
| 12 | CXCR2     | NM_001557.3            | ATGAGTAGACGGTCTTCGGAA<br>ATTATATGTCTCAGCATCTGG   | GTTAGCCAGCCTGCTATGAGG<br>ATCCGTAAACAGCATCCG     | CAGGAGCAAGGACAGACC     | GACATGGGCAACAATACAGC   |
| 13 | TLR4      | NM_138554.4            | GTTCTCTGGCAGTGAGAAGGT<br>TGATGGACCTCTGAATCTCT    | ACGTGTGAAGGTATTCAAGGCA<br>ATGTGGTCAAGGAGCATTG   | CCAGCCATCTGTGTCTCC     | CATTGTCTTTCTGTGTGGG    |
| 14 | AQP9      | NM_020980.3            | ACAATGGCTCACAGATTCCTGG<br>AAGCCACAGCCTCTAATG     | TCATCTGGCTGTGAAAGTGAGG<br>CTTCTCTGAGGACTCTGT    | TCTGGTAAGAGTCTCTGACTGT | ACCACAACAGGTAGGTATTGG  |
| 15 | S100A8    | NM_002964.4            | TCCAGCTCGGTCAACATGATGC<br>CTGCATGTCTCTGTCCAG     | ACGTCTACCACAAGTACTCCCTC<br>AATTTCTCAGGTCATCCCT  | CACCAGGTCTCTGAAAGACA   | GGGAATTTCCATGCCGCTCA   |
| 16 | NCF4      | NM_000631.4            | AAGCATGGAAGTGGCGGTAGTC<br>GTCATCGAGGTGAAGA       | GCCAGACAGCAAGAGCAGTCTC<br>CTGTTTCAACCCAC        | GCGGTAGATGAGGTACTTGG   | CACACTCCAGCCAAAGT      |
| 17 | KCNE3     | NM_005472.4            | TCAGTCAGTTTCAGGAGTCCCT<br>ATGTGTCCAGAGACATCCT    | AGCAGTCTGAGCTTCTACCGAG<br>TTCCATTGGTAGTCTCCATAG | CACACTAAGGCTCTCCAC     | CCCACCTCAATCCCTGTTG    |
| 18 | S100A12   | NM_005621.1            | AGCGCAATGGTACCAGGGCCT<br>GGATGCTAATCAAGAT        | CCCATTACCACCCACAAGAT<br>CATTGAGGACATTGCTGG      | ATTCTTGAAAGTCGACCTGTT  | TAGGTAGCTCTCTGAAGGCTT  |
| 19 | CLEC4E    | NM_014358.2            | TTCTGCTCCTCTGTGAGTAAG<br>AACTGCTCAGCCATG         | GGACTGTGAGCCAGGTTGTCC<br>TCAGAGACTTTGTCAAAGGT   | GATAACCACAGGTGAGCC     | GAGGGTCAGTGGCAATGG     |
| 20 | CASP5     | NM_004347.3            | CCTTCTCCTCGTGGATCTTGCCA<br>TCCTTGGCACTCATCTC     | AACACCACATAACGTGTCTCTGG<br>TTCTGGAAGCATGTGATGAG | TGCTCCAGGTTCTCAGA      | GGCTCCATCTTATTACGGAA   |
| 21 | TNFAIP6   | NM_007115.3            | CCTTAGCTTCTGCGTAGGTGAG<br>ATATGGCTTGAACGAGCAG    | TTGAAGCGGCCATCTCGCAGC<br>AGCACAGACATGAA         | CCAGACCGTCTCTCTG       | ACTTACAAGCAGCTAGAGGC   |
| 22 | IL18RAP   | NM_003853.2            | CCAAGCGTCTGATCCTTGCTTCT<br>ACAGGCACTGGATTGA      | TTCAAGTGAGGCCACTTCTATCC<br>ATCAGGAAATAGGCTCAGG  | CCGGTACAGCAGCACTATT    | TCTGAGTGAAGAACACTTGGC  |
| 23 | AF161365  | AF161365.1             | ACCTCGGCAATGAACGGACAT<br>CTCCAACCTCACAGA         | ATAGAGTGGGAGGTGGGAGCT<br>CTTCTCTAGCACAGACC      | GACTGATCACTTCTGTCTCT   | CCTCGTGTGCTTCTTATT     |
| 24 | HuPO      | NM_053275.3            | CGCATCATGGTGTCTTGCCAA<br>GCAGATGCAGCAGATC        | CTCTGGAGAACTGCTGCCTCT<br>CAGTGAGTCTCTCTTGT      | ATCAGCACACAGCCTTC      | GGAAATGTGGGCTTGTGTTTC  |

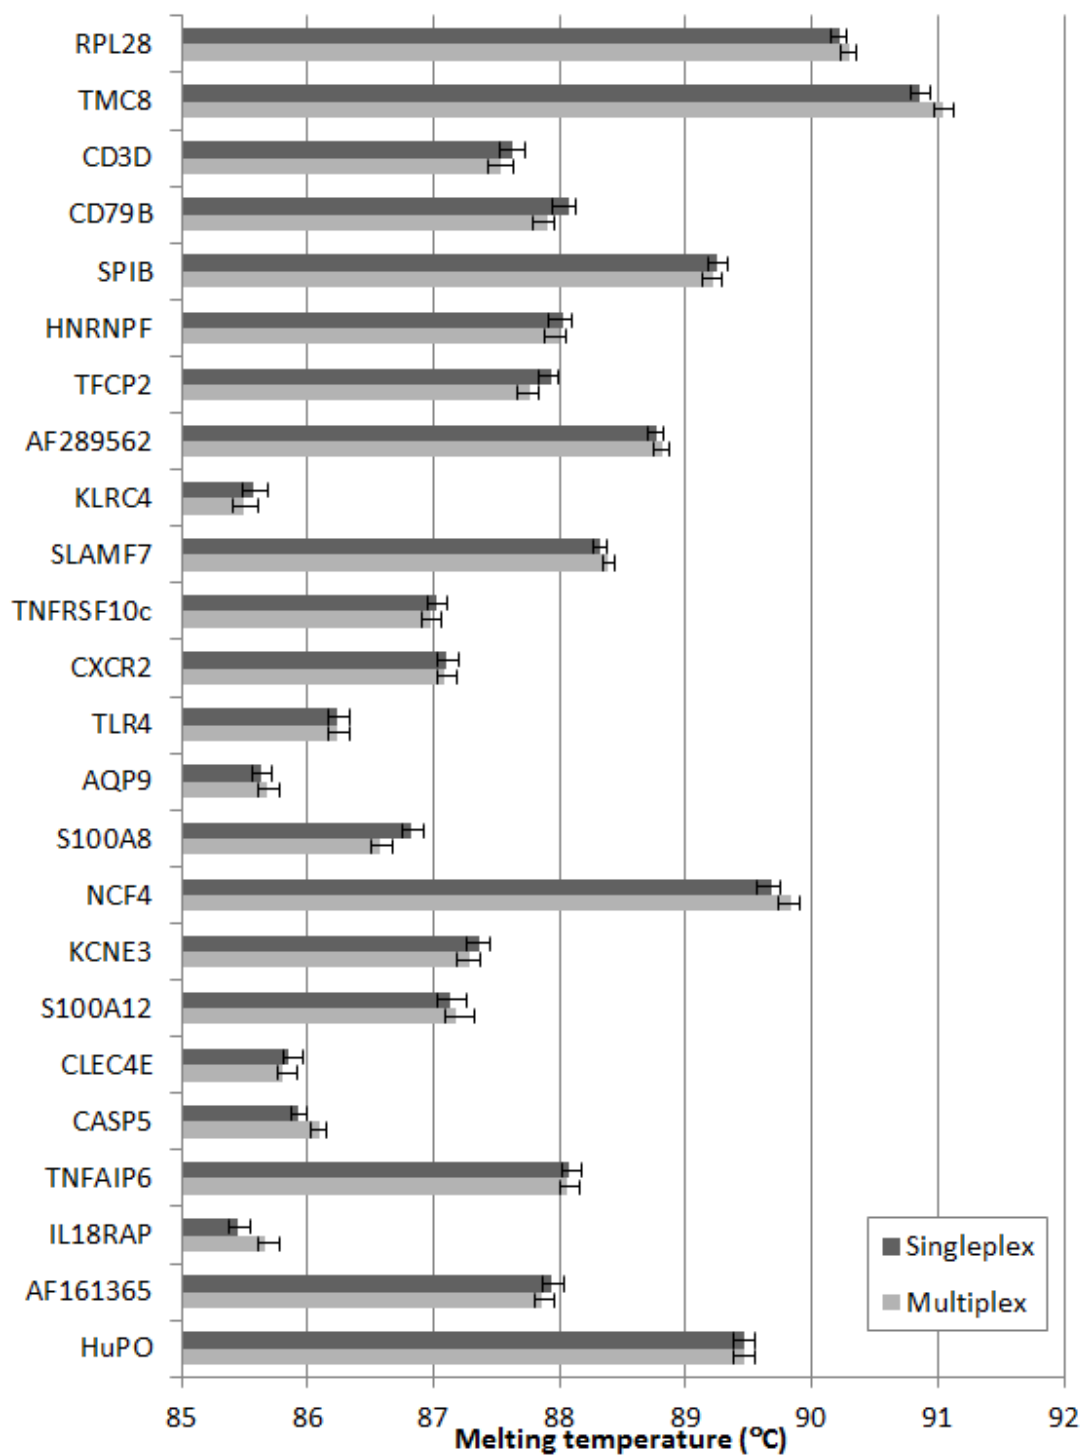

**Supplementary Figure 1:**

*Melting temperature for singleplex versus multiplex detection.*

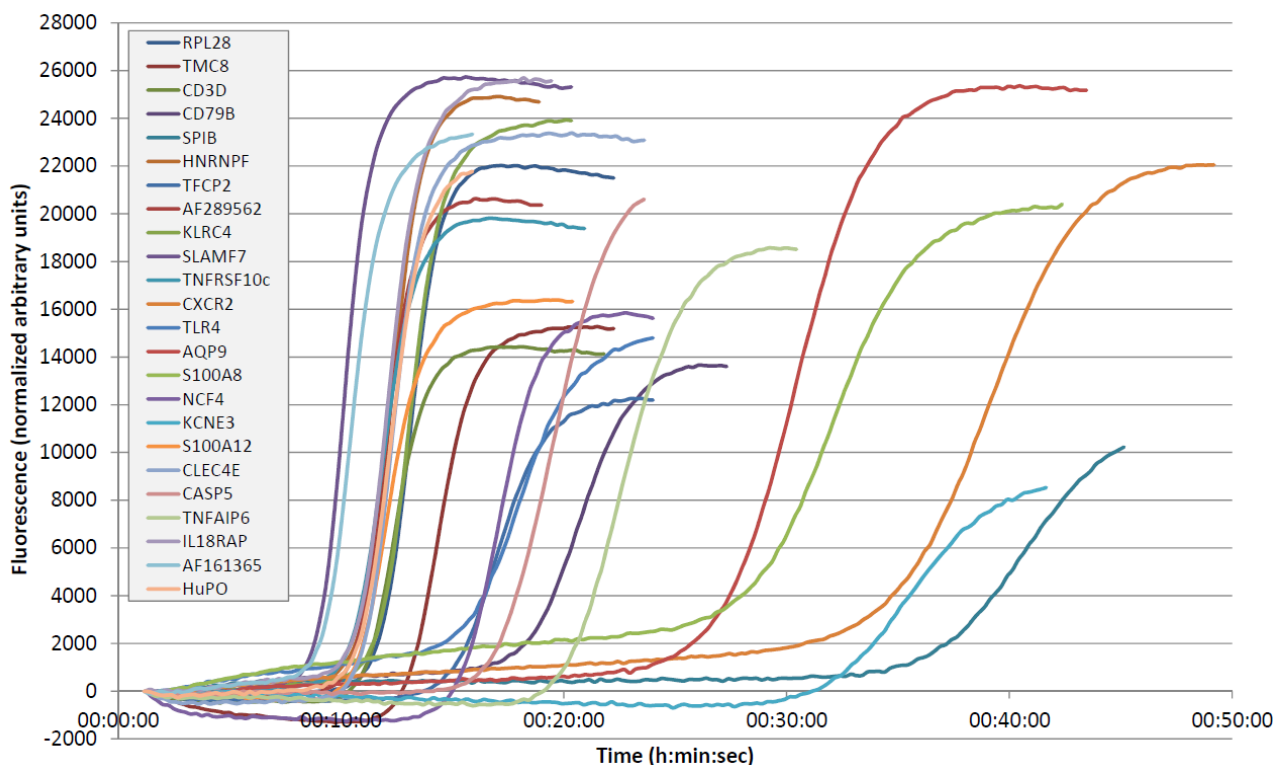

### Supplementary Figure 2:

*Fluorescent development in isothermal amplification for detection of all 24 mRNA targets.*

RNA was purified from whole blood from which the RT-isoPCR method was performed. A first-stage multiplex PCR with all 24 primer sets was performed, the product of which was used as template in individual isothermal amplification reactions targeting each of the 24 mRNAs. For simplicity and ease of viewing, the fluorescent developments after the plateaus are reached are not shown. In general, the fluorescence level decreased after the plateaus were reached.

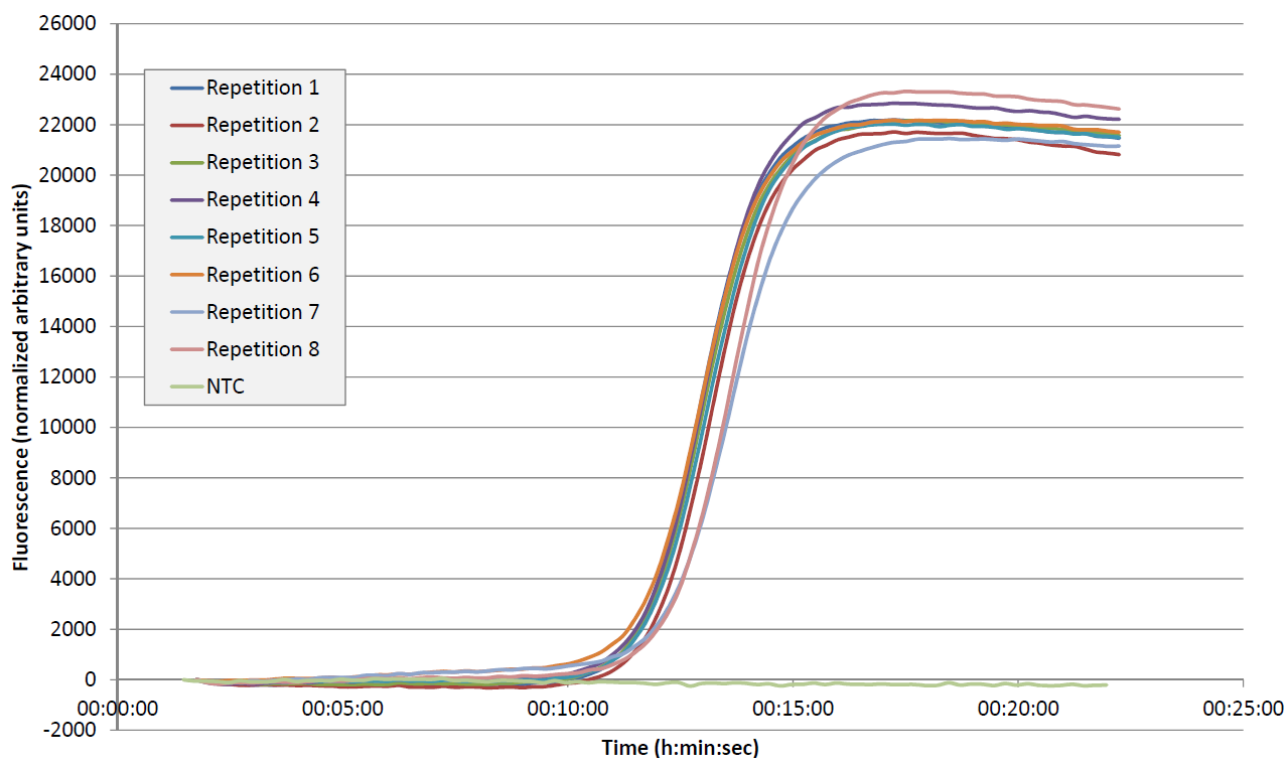

### Supplementary Figure 3:

#### *Fluorescence development in isothermal amplification for detection of RPL28.*

RNA was purified from whole blood from which the RT-isoPCR method was performed for 8 repetitions. Each RT-isoPCR repetition was performed using a first-stage multiplex PCR with all 24 primer sets. The products were then detected in isothermal amplifications with RPL28 specific primer sets. The time of detection is determined as the time point at which the highest slope (fluorescence vs time) is observed. No template controls were included as negative controls.
